# Supplementary material
Source: PubMed Central journal article supplement (PMC4485405)

# Supplemental Figure 1

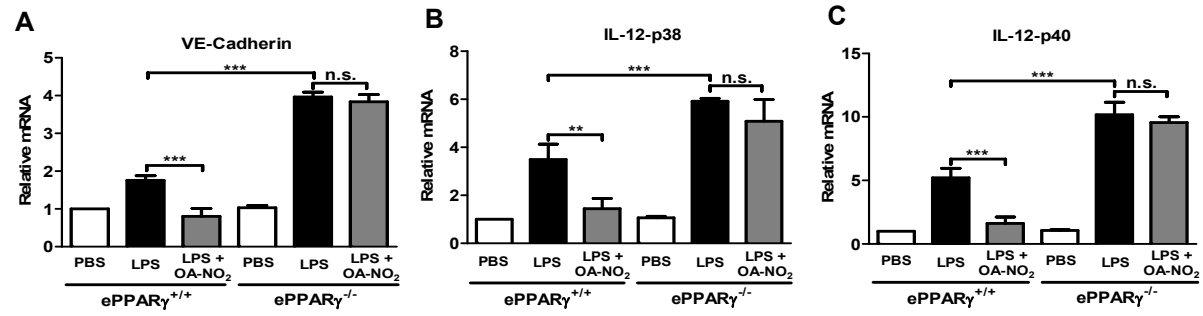

Supplement: NIHMS410968-supplement-2.pdf [file NIHMS410968-supplement-2.pdf]
